# Supplementary material for: Association between systemic sclerosis and peripheral arterial disease: a nationwide observation retrospective claim records cohort study in Taiwan
Source: PubMed Central journal article supplement — BMJ Open. 2021 Sep 29;11(9):e048149. doi: 10.1136/bmjopen-2020-048149 (PMC8483053; doi:10.1136/bmjopen-2020-048149), 2021-09-29
Supplement: bmjopen-2020-048149supp001.pdf [file bmjopen-2020-048149supp001.pdf]

Supplementary Table. The overall Incidence of peripheral arterial disease (per 1,000 person-years), estimated hazard ratios in patients with systemic sclerosis compared to those without Systemic sclerosis

| Variables                         | Systemic sclerosis |                     |
|-----------------------------------|--------------------|---------------------|
|                                   | No(N=4396)         | Yes(N=1099)         |
| Person-years                      | 24802              | 4212                |
| Event, n                          | 66                 | 257                 |
| Rate                              | 2.66               | 61.0                |
| Crude HR (95% CI)                 | 1(Reference)       | 20.7(15.8, 27.1)*** |
| Adjusted HR (95% CI) <sup>a</sup> | 1(Reference)       | 22.8(17.0, 30.7)*** |

Adjusted HR<sup>†</sup> : multivariable analysis including age, gender, and comorbidities of diabetes, hypertension, hyperlipidemia, COPD, heart failure, CAD, stroke, and asthma

\*p<0.01, \*\*p<0.001
